# Supplementary material for: UV-B Filter Octylmethoxycinnamate Is a Modulator of the Serotonin and Histamine Receptors in Human Umbilical Arteries
Source: MDPI journal article supplement (doi:10.3390/biomedicines10051054), 2022-05-03
Supplement: s1 [file s1]

# **UV-B filter octylmethoxycinnamate is a modulator of the serotonin and histamine receptors in human umbilical arteries**

**Margarida Lorigo<sup>1,2</sup>, Carla Quintaneiro<sup>3</sup>, Luiza Breitenfeld<sup>1,2</sup> and Elisa Cairrao<sup>1,2</sup>►**

Margarida Lorigo<sup>1,2</sup> ([margarida.lorigo@gmail.com](mailto:margarida.lorigo@gmail.com); ORCID ID: 0000-0002-4752-6398), Carla Quintaneiro<sup>3</sup> ([cquintaneiro@ua.pt](mailto:cquintaneiro@ua.pt); ORCID ID: 0000-0002-1151-8177), Luiza Breitenfeld<sup>1,2</sup> ([luiza@fcsaude.ubi.pt](mailto:luiza@fcsaude.ubi.pt); ORCID ID: 0000-0001-8550-1645) and Elisa Cairrao<sup>1,2</sup>► ([ecairrao@fcsaude.ubi.pt](mailto:ecairrao@fcsaude.ubi.pt); ORCID ID: 0000-0002-4823-5701)

<sup>1</sup> CICS-UBI, Health Sciences Research Centre, University of Beira Interior, 6200-506, Covilhã, Portugal.

<sup>2</sup> FCS - UBI, Faculty of Health Sciences, University of Beira Interior, 6200-506 Covilhã, Portugal

<sup>3</sup> Department of Biology & CESAM (Centre for Environmental and Marine Studies), University of Aveiro, 3810-193 Aveiro, Portugal

## **► Corresponding author:**

Elisa Cairrao, PhD

Health Sciences Research Centre

University of Beira Interior

Av. Infante D. Henrique

6200-506 Covilhã

Portugal

Tel.: +351-275-329049

Fax: +351-275-329099

e-mail: [ecairrao@fcsaude.ubi.pt](mailto:ecairrao@fcsaude.ubi.pt)

ORCID iD: <https://orcid.org/0000-0002-4823-5701>

## Supplementary Material

**Table S1** Basal tension of the human umbilical artery (HUA)-rings exposed to octylmethoxycinnamate (OMC, 0.001–50  $\mu\text{mol/L}$ ) after an incubation with OMC (0, 1, 10 and 50  $\mu\text{mol/L}$ ). Values are presented as mean of the basal tension  $\pm$  S.E.M

| OMC<br>( $\mu\text{mol/L}$ ) | Basal Tension of OMC (mN) |                                   |                            |                             |
|------------------------------|---------------------------|-----------------------------------|----------------------------|-----------------------------|
|                              | Without incubation        | Incubation of 1 $\mu\text{mol/L}$ | Incubation of 10           | Incubation of 50            |
|                              | (n=7)                     | (n=12)                            | $\mu\text{mol/L}$<br>(n=7) | $\mu\text{mol/L}$<br>(n=12) |
| 0.001                        | $-0.40 \pm 0.29$          | $0.17 \pm 0.16$                   | $0.13 \pm 0.16$            | $0.11 \pm 0.27$             |
| 0.01                         | $-0.17 \pm 0.27$          | $-0.10 \pm 0.21$                  | $0.17 \pm 0.26$            | $-0.42 \pm 0.17$            |
| 0.1                          | $-0.22 \pm 0.25$          | $-0.19 \pm 0.28$                  | $-0.03 \pm 0.36$           | $-0.68 \pm 0.19$            |
| 1                            | $-0.36 \pm 0.33$          | $-0.13 \pm 0.32$                  | $0.20 \pm 0.38$            | $-1.33 \pm 0.32$            |
| 10                           | $-0.32 \pm 0.29$          | $-0.28 \pm 0.37$                  | $-0.08 \pm 0.50$           | $-1.26 \pm 0.29$            |
| 50                           | $-0.28 \pm 0.34$          | $-0.02 \pm 0.43$                  | $-0.16 \pm 0.62$           | $-1.42 \pm 0.34$            |

**Table S2** Tension in human umbilical artery (HUA)-rings incubated with octylmethoxycinnamate (OMC) contracted by the L69 (5-HT<sub>1B/D</sub> agonist; 1  $\mu\text{mol/L}$ ). The contractile dual effect is represented by responsive and unresponsive HUA-rings. Each value represents the mean of the tensions  $\pm$  S.E.M. and the n is the number within brackets. \* Represents significant differences between responsive and unresponsive HUA-rings ( $p < 0.05$ , Student's t-test)

| OMC ( $\mu\text{mol/L}$ ) | Tension of HUA-rings contracted by L69 (mN) |                          |
|---------------------------|---------------------------------------------|--------------------------|
|                           | Responsive HUA-rings                        | Unresponsive HUA-rings   |
| 0                         | $9.74 \pm 0.89$ (n=7)                       | $3.39 \pm 0.97$ (n=9) *  |
| 1                         | $17.71 \pm 1.58$ (n=6)                      | $2.88 \pm 1.06$ (n=8) *  |
| 10                        | $18.56 \pm 2.52$ (n=8)                      | $3.05 \pm 0.68$ (n=17) * |
| 50                        | $27.12 \pm 4.64$ (n=7)                      | $2.94 \pm 0.37$ (n=26) * |

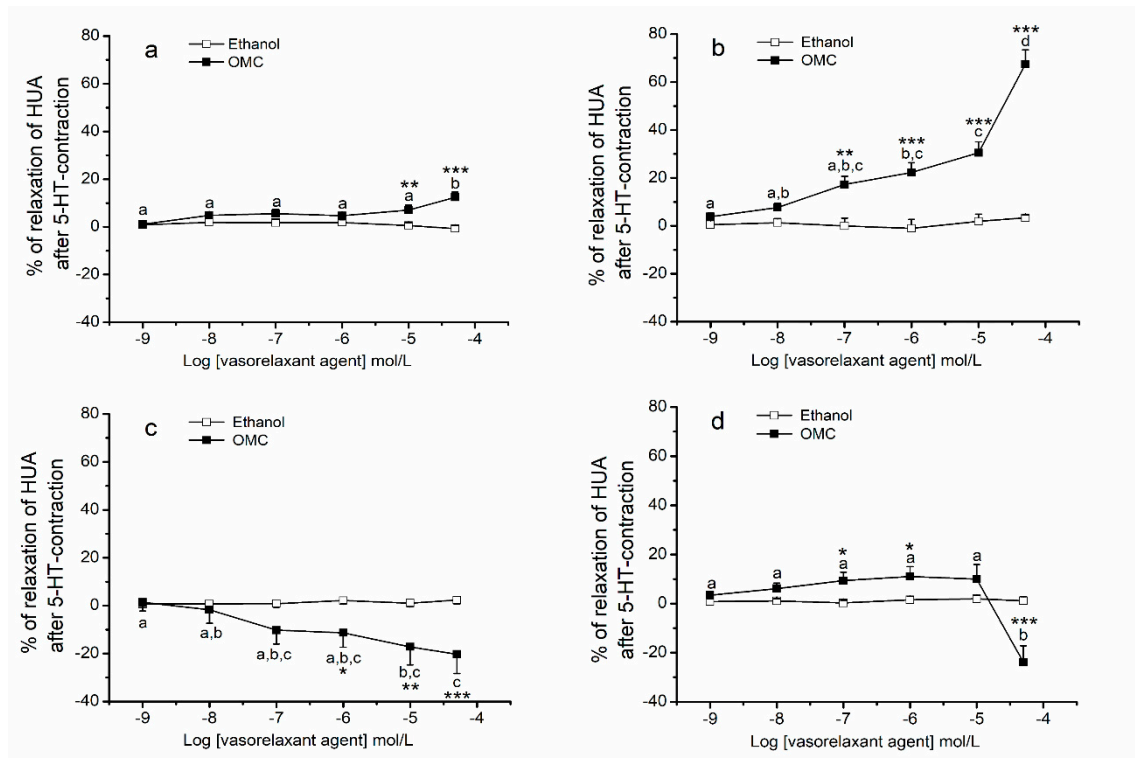

**Figure S1** Percentage of relaxation of human umbilical artery (HUA)-rings incubated with (A) 0  $\mu\text{mol/L}$ , (B) 1  $\mu\text{mol/L}$ , (C) 10  $\mu\text{mol/L}$  and (D) 50  $\mu\text{mol/L}$  of octylmethoxycinnamate (OMC), contracted with serotonin (5-HT; 1  $\mu\text{mol/L}$ ) and exposed to cumulative concentrations of OMC (0.001  $\mu\text{mol/L}$ -50  $\mu\text{mol/L}$ ). Each point represents the mean and vertical lines the S.E.M. \* Represents a significant difference when compared with the respective solvent control: \* ( $p < 0.05$ ), \*\* ( $p < 0.01$ ), \*\*\* ( $p < 0.001$ ); and the different letters represents significant differences between OMC concentrations ( $p < 0.05$ ); two-way ANOVA method followed by Holm-Sidak post-hoc tests

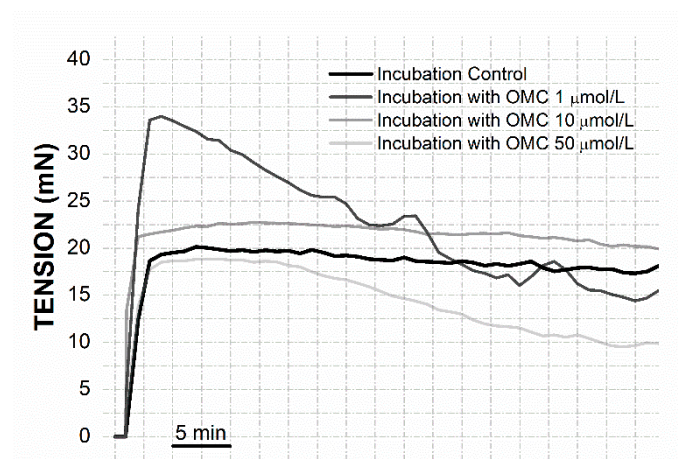

**Figure S2** Real tension induced by Histamine (Hist; 10  $\mu\text{mol/L}$ ) on human umbilical artery (HUA)-rings incubated with different octylmethoxycinnamate (OMC)-concentrations (0, 1, 10 and 50  $\mu\text{mol/L}$ ). Data are expressed as real tension in grams (g) of at least three different arteries

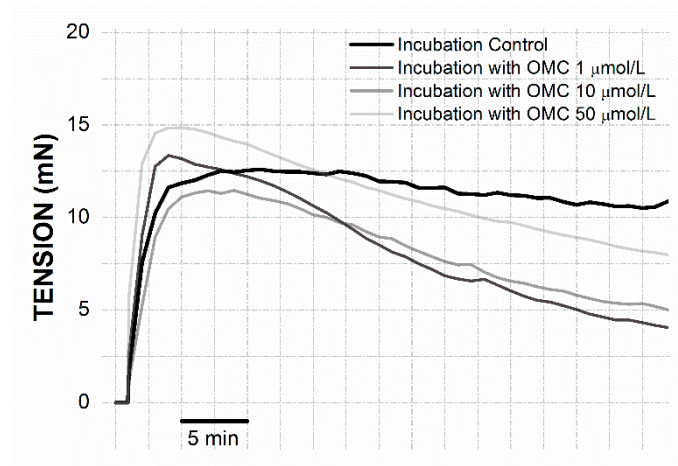

**FigureS3** Real tension induced by Histamine (Hist; 10 μmol/L) after adding cimetidine (Cim, H<sub>2</sub> antagonist, 10 μmol/L) on human umbilical artery (HUA)-rings incubated with different octylmethoxycinnamate (OMC)-concentrations (0, 1, 10 and 50 μmol/L). Data are expressed as real tension in grams (g) of at least three different arteries
